# Supplementary material for: Interrogating breast cancer heterogeneity using single and pooled circulating tumor cell analysis
Source: PubMed Central journal article supplement (PMC9256697; doi:10.1038/s41523-022-00445-7), 2022-07-05
Supplement: 41523_2022_445_MOESM1_ESM.pdf [file 41523_2022_445_MOESM1_ESM.pdf]

**Supplementary Figure 1.** Timeline of the 3 patients.

Timing of the main tumor-related events are shown, as well as the timing of biopsies and CTC samples collection.

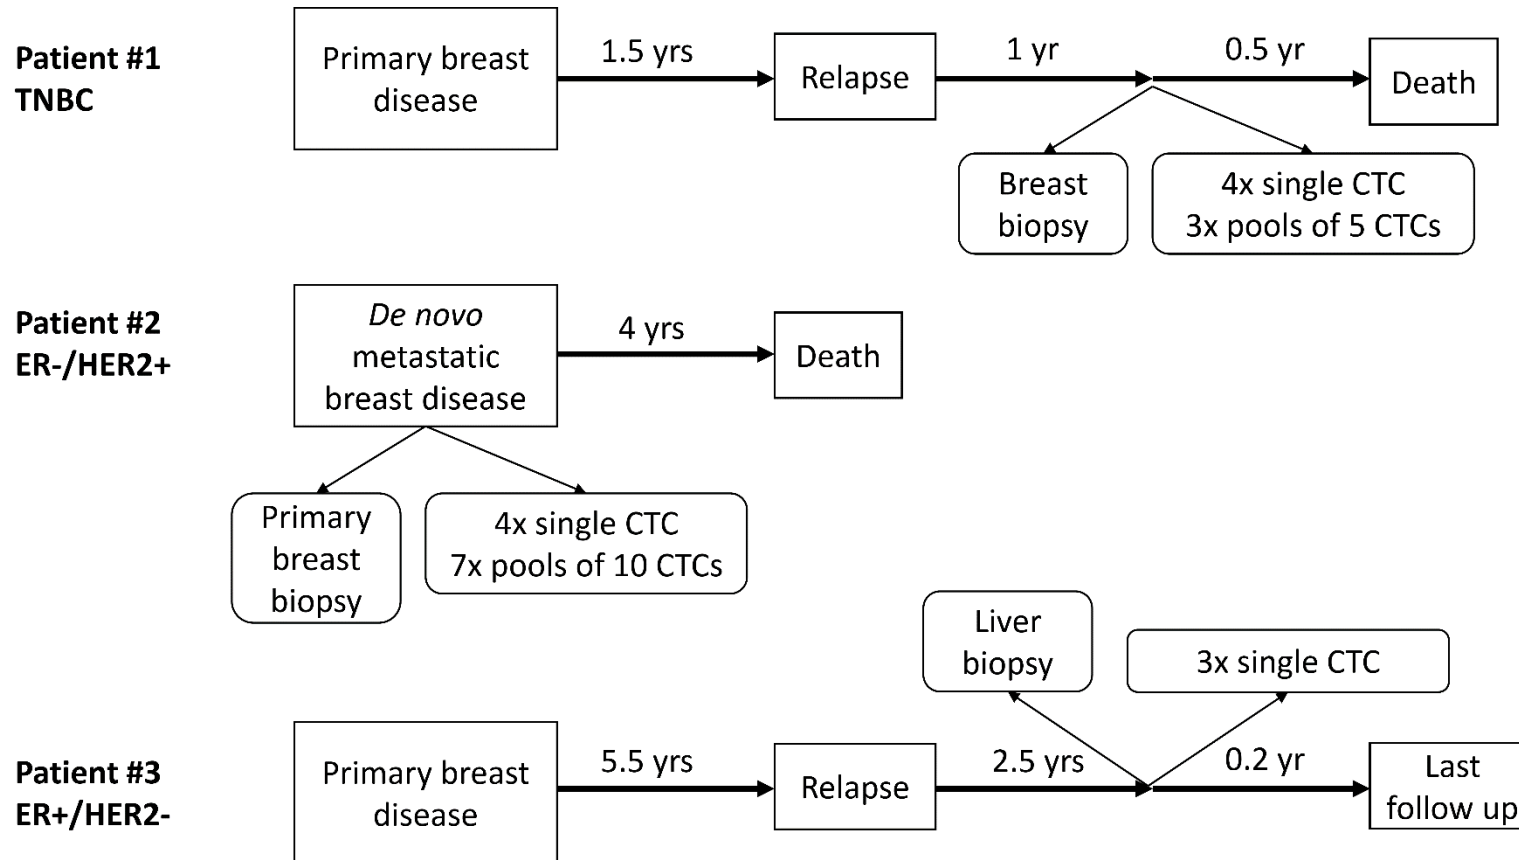

**Supplementary Table 1.** Patient and tumor characteristics from the 3 patients included in the study.

| ID | BC type         | Time to relapse    | Age at diagnosis | Metastatic sites at study entry                  | Primary tumor characteristics |       |     |     |       | Biopsy characteristics |           |       |     |     |       |      | Lines of treatment received before study inclusion |    |                |
|----|-----------------|--------------------|------------------|--------------------------------------------------|-------------------------------|-------|-----|-----|-------|------------------------|-----------|-------|-----|-----|-------|------|----------------------------------------------------|----|----------------|
|    |                 |                    |                  |                                                  | histology                     | grade | ER  | PR  | HER2  | organ                  | histology | grade | ER  | PR  | HER2  | Ki67 | CHT                                                | HT | Targeted Agent |
| #1 | Triple negative | 2.5 years          | 54               | lymph node, pleura, liver, skin                  | ductal                        | 2     | ER- | PR- | HER2- | breast                 | ductal    | 2     | ER- | PR- | HER2- | 90%  | 3                                                  | 0  | 1              |
| #2 | ER-/HER2+       | de novo metastatic | 49               | lymph node, bone, lung, liver, skin, muscle, eye | ductal                        | 2     | ER- | PR- | HER2+ | primary breast         | ductal    | 3     | ER- | PR- | HER2+ | 60%  | 0                                                  | 0  | 0              |
| #3 | ER+/HER2-       | 8 years            | 51               | liver, bone                                      | mixed                         | NA    | ER+ | PR+ | HER2- | liver                  | NA        | NA    | ER- | PR- | HER2- | <10% | 3                                                  | 2  | 1              |

BC = breast cancer

ER = estrogen receptor

HER2 = human epidermal growth factor receptor 2

PR = progesterone receptor

CHT = chemotherapy

HT = hormonotherapy

**Supplementary Table 2.** SNVs and CNAs identified in bulk tumor as well as CTC samples. Median and range values are provided for each patient.

| <b>Patient ID</b>                                 | <b>TNBC #1</b>    | <b>HER2+ #2</b>    | <b>ER+ #3</b>       |
|---------------------------------------------------|-------------------|--------------------|---------------------|
| <b>SNV in CTC samples</b>                         | 831 (203 to 1477) | 2041 (475 to 3328) | 2527 (2011 to 3006) |
| <b>nonsynonymous/nonsense SNV in CTC samples</b>  | 401 (80 to 655)   | 935 (207 to 1463)  | 1101 (910 to 1341)  |
| <b>SNV in bulk samples</b>                        | 91                | 144                | 323                 |
| <b>nonsynonymous/nonsense SNV in bulk samples</b> | 32                | 49                 | 140                 |
| <b>CNA in CTC samples</b>                         | 187 (174 to 221)  | 127 (115 to 166)   | 97 (62 to 98)       |
| <b>CNA in bulk samples</b>                        | 80                | 113                | 82                  |

**Supplementary Table 3.** Somatic SNVs identified in the CTC samples from patient with TNBC (#1).

| chrom | pos       | ref | alt | gene     | Nref | Nalt | VAF    | 1 CTCa        | 1 CTCb       | 1 CTCc       | 1 CTCd       | 5 CTCa       | 5 CTCb       | 5 CTCc       |
|-------|-----------|-----|-----|----------|------|------|--------|---------------|--------------|--------------|--------------|--------------|--------------|--------------|
| chr1  | 7980899   | A   | T   | TNFRSF9  | 204  | 25   | 0,1092 | 1/2           | <b>2/2</b>   | 2/2          |              | 1/1          |              |              |
| chr1  | 44437288  | C   | G   | DPH2     | 85   | 6    | 0,0659 |               |              |              |              |              |              |              |
| chr1  | 109642878 | G   | C   |          | 30   | 6    | 0,1667 | <b>7/7</b>    |              | 3/3          | 1/1          | 2/5          | <b>5/5</b>   |              |
| chr1  | 118497291 | G   | C   |          | 43   | 5    | 0,1042 | 1/4           | 1/4          | 0/5          | 0/1          | 1/5          | 0/1          | 0/1          |
| chr1  | 152193276 | A   | G   | HRNR     | 122  | 15   | 0,1095 |               |              |              |              | 0/30         |              |              |
| chr1  | 159832239 | C   | T   |          | 86   | 101  | 0,5401 | <b>12/13</b>  | <b>6/8</b>   | <b>12/15</b> | <b>8/10</b>  | <b>12/13</b> | <b>6/7</b>   | <b>4/4</b>   |
| chr1  | 167408587 | G   | C   | CD247    | 97   | 8    | 0,0762 | <b>14/43</b>  | 0/36         | <b>9/55</b>  | 1/38         | <b>9/27</b>  | <b>13/21</b> | <b>3/17</b>  |
| chr2  | 54872338  | A   | G   |          | 38   | 6    | 0,1364 | 0/25          | <b>7/27</b>  | 6/27         | 5/26         | 1/18         | <b>6/19</b>  | 1/3          |
| chr2  | 79313419  | C   | T   |          | 50   | 9    | 0,1525 |               |              |              |              |              |              |              |
| chr2  | 89878487  | G   | C   |          | 61   | 5    | 0,0758 | 0/11          | 0/7          | 0/3          | 0/8          | 0/22         | 0/4          | 0/2          |
| chr2  | 179459236 | C   | T   | TTN      | 73   | 6    | 0,0759 | <b>6/6</b>    | 0/3          |              |              |              | 1/1          |              |
| chr3  | 49568307  | C   | A   | DAG1     | 67   | 9    | 0,1184 |               | 2/3          | 0/3          |              | 2/3          | 1/3          |              |
| chr3  | 113377662 | G   | C   | USF3     | 169  | 17   | 0,0914 | 0/67          | <b>14/27</b> | <b>8/22</b>  | 0/10         | 2/22         | <b>17/40</b> | <b>9/18</b>  |
| chr3  | 126679043 | G   | A   | CHCHD6   | 76   | 12   | 0,1364 |               |              |              |              |              |              |              |
| chr3  | 152847195 | G   | A   |          | 22   | 4    | 0,1538 | 0/1           | 0/2          | 0/17         | 0/17         | 0/3          | 0/6          | 0/5          |
| chr4  | 49139234  | A   | T   |          | 94   | 8    | 0,0784 | 1/5           | 0/2          | 1/7          | 0/2          | 0/8          | 1/5          | 0/1          |
| chr4  | 94085961  | C   | T   |          | 52   | 5    | 0,0877 |               | 0/1          |              | 0/1          |              |              |              |
| chr4  | 108935771 | T   | C   |          | 156  | 11   | 0,0659 | 0/41          | 1/40         | 0/42         | 1/17         | 1/29         | 0/21         | 0/20         |
| chr4  | 115544795 | C   | T   | UGT8     | 129  | 75   | 0,3676 | <b>89/114</b> | <b>51/51</b> | <b>56/57</b> | <b>46/46</b> | <b>45/45</b> | <b>82/89</b> | <b>28/28</b> |
| chr4  | 126238020 | C   | T   | FAT4     | 249  | 20   | 0,0743 | 0/4           | 2/13         | <b>5/17</b>  | 2/16         | 2/22         | <b>8/18</b>  | 0/3          |
| chr5  | 191809    | G   | A   | LRRC14B  | 39   | 7    | 0,1522 |               |              |              |              |              |              |              |
| chr5  | 24749483  | A   | G   |          | 25   | 5    | 0,1667 | 0/4           | 0/5          | 0/4          |              | 0/2          | 0/3          | 0/2          |
| chr5  | 127623040 | C   | T   | FBN2     | 78   | 9    | 0,1034 | <b>4/33</b>   | <b>16/44</b> | <b>12/30</b> | <b>14/41</b> | <b>11/37</b> | <b>13/47</b> | <b>9/15</b>  |
| chr6  | 54186214  | T   | A   |          | 65   | 5    | 0,0714 | 0/15          | 2/8          | 2/6          | 3/7          | 2/6          | 2/11         | 0/6          |
| chr6  | 88075011  | C   | A   | C6orf163 | 58   | 9    | 0,1343 | 1/40          | <b>12/40</b> | <b>9/40</b>  | <b>8/25</b>  | 3/16         | 2/26         | 2/18         |
| chr6  | 99893989  | C   | G   | USP45    | 106  | 7    | 0,0619 | 0/25          | <b>5/16</b>  | <b>7/26</b>  | <b>9/13</b>  | 2/13         | 0/14         | 2/6          |
| chr6  | 125379084 | A   | G   |          | 65   | 9    | 0,1216 |               |              | 0/1          |              |              | 0/1          |              |
| chr8  | 55533891  | G   | A   | RP1      | 146  | 9    | 0,0581 | <b>6/9</b>    | 2/6          | 0/20         | 1/3          | 2/9          |              | 0/1          |
| chr8  | 101078454 | G   | A   | RGS22    | 85   | 10   | 0,1053 | 1/9           | 1/7          | <b>6/11</b>  | 1/7          | 2/5          | 0/10         | 0/10         |
| chr9  | 66455393  | C   | T   |          | 29   | 6    | 0,1714 |               |              |              |              |              |              |              |
| chr9  | 68409680  | C   | G   |          | 41   | 6    | 0,1277 |               |              | 0/1          |              |              |              | 0/1          |
| chr9  | 139996438 | A   | C   | MAN1B1   | 201  | 17   | 0,078  | 0/102         | 0/145        | 0/219        | 0/153        | 0/137        | 1/72         | 0/16         |

|       |           |   |   |         |     |    |        |              |              |              |              |              |              |              |
|-------|-----------|---|---|---------|-----|----|--------|--------------|--------------|--------------|--------------|--------------|--------------|--------------|
| chr10 | 42389587  | G | A |         | 129 | 9  | 0,0652 |              |              | 1/1          |              |              |              |              |
| chr11 | 51580489  | T | G |         | 157 | 9  | 0,0542 |              |              |              |              |              |              |              |
| chr11 | 55136144  | G | C | OR4A15  | 112 | 12 | 0,0968 | <b>14/19</b> | <b>12/21</b> | <b>8/21</b>  | <b>8/14</b>  | 5/8          | <b>9/16</b>  | 1/3          |
| chr11 | 67207261  | C | T | CORO1B  | 58  | 12 | 0,1714 |              | 1/1          | 0/3          | 1/1          | 1/1          |              |              |
| chr12 | 3392390   | C | G |         | 35  | 5  | 0,125  |              |              |              | 1/1          |              | 0/1          |              |
| chr12 | 6422182   | G | C |         | 63  | 8  | 0,1127 |              |              |              |              | 0/1          |              |              |
| chr12 | 8289361   | G | C |         | 206 | 19 | 0,0844 | 3/11         | <b>3/15</b>  | 1/13         | 1/9          | <b>3/9</b>   | <b>7/23</b>  | 1/15         |
| chr12 | 8289411   | G | C | CLEC4A  | 237 | 30 | 0,1124 | <b>4/32</b>  | <b>4/25</b>  | <b>14/42</b> | <b>8/27</b>  | <b>7/22</b>  | <b>16/54</b> | <b>5/24</b>  |
| chr12 | 8289471   | G | C | CLEC4A  | 234 | 33 | 0,1236 | 3/30         | <b>3/22</b>  | <b>17/43</b> | <b>6/23</b>  | <b>7/15</b>  | <b>18/56</b> | <b>4/15</b>  |
| chr12 | 8289489   | G | A | CLEC4A  | 234 | 31 | 0,117  | 3/29         | <b>3/22</b>  | <b>13/37</b> | <b>4/22</b>  | <b>7/17</b>  | <b>17/53</b> | 2/14         |
| chr12 | 8289546   | G | C |         | 141 | 19 | 0,1188 | 0/16         | 0/6          | <b>6/18</b>  | <b>3/11</b>  | <b>4/12</b>  | <b>5/24</b>  | 0/12         |
| chr12 | 21531170  | G | A |         | 182 | 11 | 0,057  | <b>15/58</b> | <b>25/54</b> | <b>11/39</b> | <b>11/35</b> | <b>6/21</b>  | <b>13/40</b> | 1/12         |
| chr14 | 96001712  | C | T | GLRX5   | 36  | 7  | 0,1628 |              |              |              |              |              |              |              |
| chr14 | 102472314 | G | A | DYNC1H1 | 71  | 17 | 0,1932 | 0/1          |              | 0/1          | 1/2          | 1/1          | 0/1          | 2/3          |
| chr14 | 105945497 | C | T | CRIP2   | 67  | 5  | 0,0694 |              |              |              |              |              |              |              |
| chr15 | 31776672  | C | T | OTUD7A  | 147 | 18 | 0,1091 |              |              |              |              | 0/6          |              |              |
| chr16 | 33973718  | A | G |         | 38  | 8  | 0,1739 | 3/55         | 4/48         | 6/43         | 3/32         | 3/56         | 3/53         | <b>10/35</b> |
| chr16 | 46391488  | G | A |         | 270 | 17 | 0,0592 |              |              |              |              |              |              |              |
| chr16 | 57741613  | G | A |         | 91  | 14 | 0,1333 |              |              |              |              |              |              |              |
| chr17 | 7577571   | A | T | TP53    | 41  | 21 | 0,3387 | <b>35/35</b> | <b>19/19</b> | <b>27/27</b> | <b>29/29</b> | <b>43/43</b> | <b>27/27</b> | <b>9/9</b>   |
| chr17 | 42462514  | G | T |         | 46  | 12 | 0,2069 |              |              |              |              | 2/2          |              |              |
| chr17 | 48824049  | A | T | LUC7L3  | 108 | 15 | 0,122  |              | <b>7/7</b>   | 0/3          |              | 2/9          | <b>5/5</b>   | 1/4          |
| chr17 | 53068122  | T | A |         | 27  | 7  | 0,2059 |              |              |              |              |              |              |              |
| chr17 | 60744671  | A | G |         | 52  | 6  | 0,1034 |              | 1/1          | 1/2          |              | 0/1          |              | 2/2          |
| chr18 | 18512329  | G | A |         | 60  | 11 | 0,1549 | 7/51         | 5/85         | 13/70        | 7/54         | 8/67         | 6/63         | 4/79         |
| chr19 | 7626553   | C | T |         | 38  | 9  | 0,1915 | 1/2          |              | 1/1          |              | 2/3          | 0/1          | 1/1          |
| chr19 | 7684568   | C | A |         | 67  | 5  | 0,0694 |              |              |              |              |              |              |              |
| chr19 | 7831588   | A | T | CLEC4M  | 163 | 11 | 0,0632 | 0/2          | 2/10         |              | 0/6          | 3/34         | 1/5          |              |
| chr19 | 12876914  | C | T |         | 58  | 6  | 0,0938 |              |              |              | 1/1          |              | 0/1          |              |
| chr19 | 12878357  | C | G |         | 73  | 8  | 0,0988 | 2/3          | 0/1          | 0/3          | 0/1          |              |              | 0/2          |
| chr19 | 15341999  | C | T |         | 56  | 5  | 0,082  |              |              |              |              |              | 0/5          |              |
| chr19 | 17305841  | C | G | MYO9B   | 99  | 9  | 0,0833 | 0/2          | <b>2/2</b>   | 0/1          | 0/2          | 0/11         |              |              |
| chr19 | 33587261  | A | G | GPATCH1 | 105 | 16 | 0,1322 | 0/1          | 1/2          | 1/4          | <b>3/4</b>   | 0/3          | 2/11         | 1/2          |
| chr19 | 36435716  | G | A | LRFN3   | 33  | 8  | 0,1951 |              |              |              |              |              |              |              |
| chr21 | 26734749  | C | G |         | 44  | 17 | 0,2787 | <b>17/36</b> | <b>33/43</b> | <b>29/44</b> | <b>20/30</b> | <b>30/36</b> | <b>30/38</b> | <b>10/15</b> |

|       |           |   |   |         |     |    |        |              |              |              |              |              |              |            |
|-------|-----------|---|---|---------|-----|----|--------|--------------|--------------|--------------|--------------|--------------|--------------|------------|
| chr21 | 30250584  | A | G | N6AMT1  | 75  | 6  | 0,0741 | 2/2          | 0/1          | 1/2          |              | 0/2          | 1/2          | 1/2        |
| chr21 | 34927158  | G | A | SON     | 72  | 42 | 0,3684 |              |              |              |              |              | 1/3          |            |
| chr21 | 45733555  | C | T | PFKL    | 58  | 6  | 0,0938 |              |              |              |              | 1/3          | 0/1          |            |
| chr22 | 24086357  | A | C |         | 97  | 13 | 0,1182 | 2/9          | 1/3          | 1/7          |              | 1/18         |              |            |
| chr22 | 44287155  | G | A | PNPLA5  | 19  | 5  | 0,2083 |              |              |              |              |              |              |            |
| chr22 | 46654589  | A | T | PKDREJ  | 69  | 11 | 0,1375 | <b>19/26</b> | <b>13/21</b> | <b>17/58</b> | <b>16/28</b> | <b>19/50</b> | <b>15/30</b> | <b>2/6</b> |
| chrX  | 82763896  | G | A | POU3F4  | 70  | 10 | 0,125  |              |              | 1/1          |              |              |              |            |
| chrX  | 133379486 | A | G | CCDC160 | 132 | 9  | 0,0638 |              |              | 2/3          |              |              | 0/2          |            |

chrom: chromosome  
 pos: position of the chromosome  
 ref: reference allele  
 alt: alternative allele  
 VAF: variant allele frequency in the bulk sample

**Supplementary Table 4.** Somatic SNVs identified in the CTC samples from patient with HER2+ tumor (#2).

| chrom | pos       | ref | alt | gene    | Nref | Nalt | VAF     | 1 CTCa      | 10 CTCa      | 1 CTCb       | 10 CTCb      | 1 CTCc       | 10 CTCc      | 10 CTCd    | 10 CTCe      | 1 CTCd     | 10 CTCf    | 10 CTCg    |
|-------|-----------|-----|-----|---------|------|------|---------|-------------|--------------|--------------|--------------|--------------|--------------|------------|--------------|------------|------------|------------|
| chr1  | 1685590   | G   | A   | NADK    | 48   | 33   | 0,40741 |             | <b>10/10</b> | <b>5/5</b>   | 0/15         | <b>10/10</b> |              | 1/1        |              |            | 0/2        |            |
| chr1  | 6529245   | C   | G   | PLEKHG5 | 57   | 6    | 0,09524 | 0/1         | <b>5/5</b>   |              | <b>2/2</b>   | 1/1          |              |            | 0/1          | 0/1        | 2/2        |            |
| chr1  | 19494624  | G   | T   | UBR4    | 57   | 8    | 0,12308 | 0/8         | 0/33         | 0/5          | 0/2          |              | 0/2          |            | 0/8          |            | 0/4        | 0/1        |
| chr1  | 27429723  | G   | T   | SLC9A1  | 72   | 20   | 0,21739 | <b>3/9</b>  |              |              | <b>10/11</b> | <b>6/6</b>   | 1/1          |            | <b>5/7</b>   | 1/1        | <b>5/7</b> | 0/4        |
| chr1  | 32670240  | C   | A   | CCDC28B | 21   | 6    | 0,22222 |             |              |              |              |              | 0/1          | 0/2        |              |            |            |            |
| chr1  | 32790076  | C   | G   |         | 24   | 7    | 0,22581 | 0/8         |              | 0/11         | 0/7          | 0/11         | <b>15/27</b> | <b>8/9</b> | 0/14         |            | 1/13       | 0/6        |
| chr1  | 33291746  | C   | G   | S100BPB | 31   | 14   | 0,31111 | 0/9         |              | <b>12/12</b> | <b>3/4</b>   |              | 0/3          | 0/5        | 0/8          | 0/2        | <b>4/9</b> |            |
| chr1  | 45115323  | C   | T   |         | 53   | 13   | 0,19697 |             |              |              | 0/2          | 0/50         | 0/3          |            |              | 0/8        | 0/1        |            |
| chr1  | 156018385 | C   | G   | UBQLN4  | 90   | 13   | 0,12621 |             | 0/1          | 1/3          | 0/1          | 0/1          | 0/3          |            | <b>1/1</b>   | 0/2        | 0/1        |            |
| chr1  | 156714020 | C   | G   | HDGF    | 188  | 28   | 0,12963 | 0/1         |              |              | 3/3          |              | 0/1          |            | 0/28         | 1/18       | 2/7        |            |
| chr1  | 158746676 | G   | A   | OR6N2   | 141  | 11   | 0,07237 | 0/1         | 0/4          | 0/4          | 0/2          | 0/2          |              |            | 0/11         | 0/4        | 0/6        | 0/2        |
| chr1  | 177917076 | C   | T   | SEC16B  | 34   | 8    | 0,19048 | 0/1         | 1/2          | 0/1          | 0/1          | <b>5/9</b>   | 1/3          | 0/1        | 4/14         | <b>3/9</b> | 0/4        | 1/1        |
| chr1  | 181720950 | C   | T   |         | 35   | 12   | 0,25532 | 1/2         | 1/1          | 0/1          |              | 0/3          | 2/4          |            |              |            | 1/2        | 1/3        |
| chr1  | 204945625 | C   | T   |         | 90   | 6    | 0,0625  | 0/8         | 0/3          | 0/1          | 0/4          |              | 0/2          | 0/2        | 0/2          | 0/3        | 0/1        | 0/1        |
| chr1  | 205499635 | G   | C   |         | 27   | 7    | 0,20588 | 0/1         |              |              | 0/7          |              |              |            |              | 1/3        | 0/2        |            |
| chr1  | 222832114 | C   | G   | MIA3    | 146  | 35   | 0,19337 | 0/2         | 0/7          |              | <b>4/5</b>   | 0/1          | 0/12         |            |              | 0/1        | 0/4        | <b>4/4</b> |
| chr1  | 229654442 | T   | C   |         | 25   | 5    | 0,16667 | 0/1         | 0/2          | 0/1          |              | 0/4          | 0/3          |            | 0/1          | 0/4        | 0/3        | 0/1        |
| chr1  | 237431083 | T   | G   |         | 74   | 21   | 0,22105 |             |              |              | 0/1          |              | 0/1          |            |              |            | 0/1        |            |
| chr2  | 69601131  | A   | G   |         | 56   | 6    | 0,09677 |             |              |              |              |              |              |            |              |            |            |            |
| chr2  | 84904177  | C   | A   | DNAH6   | 38   | 13   | 0,2549  | 2/14        | 0/8          | <b>4/5</b>   | 1/3          | 1/3          | <b>4/7</b>   | 1/1        | <b>13/14</b> | 3/13       | 0/4        | 1/5        |
| chr2  | 85892841  | G   | A   | SFTPB   | 37   | 18   | 0,32727 |             | <b>3/6</b>   |              | 3/6          |              | 1/2          |            |              |            | <b>5/6</b> | 2/3        |
| chr2  | 133014557 | G   | A   |         | 85   | 6    | 0,06593 |             |              |              |              |              |              |            |              |            |            |            |
| chr2  | 162567158 | G   | A   |         | 37   | 6    | 0,13953 | 0/10        | 0/4          | <b>5/5</b>   | 0/4          | 1/6          | 2/6          | 3/5        | 0/4          | 0/5        | 0/1        | 0/4        |
| chr2  | 216249677 | C   | T   | FN1     | 46   | 8    | 0,14815 | 0/4         | 0/5          | 0/2          | 0/7          | 0/13         | 0/1          | 0/3        | 0/10         | 0/2        | 0/2        | 0/3        |
| chr2  | 219339380 | C   | T   | USP37   | 139  | 11   | 0,07333 | <b>4/10</b> |              |              | <b>3/5</b>   | 0/6          | 1/9          | 2/9        |              | 4/10       | 3/10       | 0/9        |
| chr2  | 219532696 | T   | C   | RNF25   | 22   | 8    | 0,26667 | <b>3/8</b>  | 0/1          | 0/1          | 1/1          | 1/18         | 2/4          |            | <b>4/5</b>   | 0/5        | 0/2        | 1/3        |
| chr3  | 12859257  | C   | G   | CAND2   | 115  | 9    | 0,07258 | 0/2         | 0/13         | 0/3          | 0/2          |              | 0/8          |            | <b>4/6</b>   | 0/3        | 0/1        |            |
| chr3  | 15071821  | C   | T   | NR2C2   | 230  | 14   | 0,05738 | 2/10        | 2/3          | 1/4          | 1/2          | 0/4          | 1/3          | 1/9        | 0/8          | <b>5/8</b> | 0/8        | 1/6        |
| chr3  | 15106620  | T   | A   | MRPS25  | 90   | 39   | 0,30233 | 5/11        | 1/1          |              | <b>15/19</b> | 0/21         | 3/15         | 3/11       |              | <b>3/3</b> | 0/6        |            |
| chr3  | 15529846  | C   | T   |         | 33   | 8    | 0,19512 |             | 0/2          |              | 0/4          | 1/27         |              |            | 0/7          | 0/8        |            | 0/1        |
| chr3  | 52431063  | G   | C   |         | 56   | 22   | 0,28205 |             |              |              |              | <b>7/7</b>   |              |            |              |            |            | 1/1        |

|       |           |   |   |          |     |    |         |              |             |             |              |              |              |            |             |              |              |             |
|-------|-----------|---|---|----------|-----|----|---------|--------------|-------------|-------------|--------------|--------------|--------------|------------|-------------|--------------|--------------|-------------|
| chr3  | 75788109  | G | A | ZNF717   | 8   | 5  | 0,38462 |              |             |             |              |              |              |            |             |              |              |             |
| chr3  | 113379095 | G | A | USF3     | 151 | 43 | 0,22165 | 0/3          | 0/3         | 0/5         | 0/3          | 0/5          | 0/5          | 0/2        | 0/5         | 0/7          | 0/9          | 0/5         |
| chr3  | 126364993 | C | G |          | 117 | 32 | 0,21477 | 0/6          | 0/5         |             | 0/3          |              | <b>4/12</b>  | 2/5        | 3/12        | 1/7          | 2/2          | <b>3/6</b>  |
| chr3  | 196434790 | G | T |          | 84  | 9  | 0,09677 | <b>2/2</b>   | 0/3         | <b>3/5</b>  | 0/4          | <b>4/4</b>   | <b>4/4</b>   |            | 0/1         | 2/3          | 0/4          | 0/1         |
| chr4  | 6623071   | G | A |          | 81  | 7  | 0,07955 | 0/3          |             |             | 0/3          |              | 0/1          |            |             |              |              | 0/1         |
| chr4  | 49123058  | G | C |          | 53  | 5  | 0,08621 | 0/29         | 1/24        | 1/87        | <b>6/105</b> | <b>6/141</b> | 4/117        | 0/6        | 1/44        | 0/37         | <b>3/159</b> | 1/76        |
| chr4  | 49156527  | C | T |          | 113 | 10 | 0,0813  | 1/4          | 0/2         | <b>0/8</b>  | <b>0/14</b>  | 0/10         | 0/7          |            | 0/3         | 0/1          | <b>0/16</b>  | 0/8         |
| chr4  | 54231440  | G | A | SCFD2    | 110 | 19 | 0,14729 | 0/6          | 0/3         | 0/1         | <b>3/4</b>   |              | 0/5          | 0/3        |             | 0/2          | 0/7          | 0/8         |
| chr5  | 1258879   | A | C |          | 39  | 20 | 0,33898 |              | 0/1         |             |              |              |              |            | 0/2         |              |              | 0/2         |
| chr5  | 32209744  | A | T |          | 12  | 4  | 0,25    |              |             |             |              |              |              |            |             |              |              |             |
| chr5  | 80655770  | G | T | ACOT12   | 60  | 6  | 0,09091 |              |             |             |              |              |              |            |             |              |              | 0/1         |
| chr5  | 134113427 | C | G |          | 43  | 11 | 0,2037  |              |             |             |              |              |              |            |             |              |              |             |
| chr5  | 140596019 | C | A | PCDHB13  | 132 | 10 | 0,07042 |              |             |             | 0/18         |              |              |            |             |              |              |             |
| chr5  | 148586510 | G | A |          | 35  | 8  | 0,18605 | <b>3/8</b>   | 0/5         |             | 2/12         | <b>4/19</b>  | 3/9          | 2/4        | 0/13        | 1/21         | <b>13/28</b> | <b>6/10</b> |
| chr5  | 176523196 | C | T |          | 39  | 12 | 0,23529 |              |             |             |              |              |              |            |             |              |              |             |
| chr5  | 179287282 | T | C |          | 48  | 4  | 0,07692 |              |             | 0/1         |              |              | 0/1          | 0/3        | 0/1         | 0/1          | 0/3          | 0/2         |
| chr6  | 31737509  | G | A | VWA7     | 39  | 7  | 0,15217 | <b>8/8</b>   | 1/10        | <b>8/15</b> | 0/5          |              | <b>11/12</b> | 2/5        | 0/15        | <b>9/18</b>  | 0/5          | 1/2         |
| chr6  | 75884874  | C | G | COL12A1  | 89  | 9  | 0,09184 | 1/3          | <b>4/12</b> | <b>5/15</b> | 1/3          | <b>4/10</b>  | 1/8          | <b>2/2</b> | <b>3/6</b>  | 3/16         | 1/7          | 0/9         |
| chr6  | 117687199 | G | A |          | 39  | 10 | 0,20408 |              |             |             |              |              | 0/1          |            | 1/1         |              |              |             |
| chr6  | 127768828 | C | T | SOGA3    | 53  | 22 | 0,29333 | <b>9/31</b>  | 0/12        | <b>3/6</b>  | <b>5/7</b>   | <b>6/14</b>  | <b>9/14</b>  | <b>5/6</b> | 5/19        | <b>16/16</b> | 3/10         | 0/1         |
| chr7  | 22197406  | C | A |          | 87  | 7  | 0,07447 | 0/4          | <b>5/9</b>  | 0/5         | 1/3          | 2/6          | 0/5          | 2/7        | 2/8         | <b>3/8</b>   | <b>3/14</b>  | <b>3/4</b>  |
| chr7  | 61979304  | A | G |          | 39  | 6  | 0,13333 |              |             |             |              | 0/1          | 0/3          | 0/1        |             |              |              |             |
| chr7  | 99507268  | A | T | TRIM4    | 90  | 41 | 0,31298 | 0/10         | 0/9         | 11/26       | 17/19        | 28/48        | 6/6          | 7/12       | 0/16        | 15/15        | 10/21        | 4/16        |
| chr7  | 150937674 | T | A |          | 33  | 7  | 0,175   | 0/6          | 0/1         | 0/2         | 0/1          |              | 0/1          | 0/2        | 0/5         | 0/2          | 0/3          | 0/2         |
| chr7  | 158334233 | G | C | PTPRN2   | 35  | 6  | 0,14634 | <b>17/17</b> | <b>5/11</b> | 0/17        | 0/13         | <b>5/5</b>   | 3/12         |            | <b>9/10</b> | <b>5/5</b>   | 2/7          | 1/1         |
| chr8  | 417612    | T | A |          | 31  | 11 | 0,2619  |              |             |             |              |              |              |            |             |              |              |             |
| chr8  | 31497520  | C | G | NRG1     | 16  | 8  | 0,33333 |              |             |             |              |              |              |            |             |              |              |             |
| chr8  | 72123392  | T | A | EYA1     | 173 | 12 | 0,06486 | 0/51         | 0/23        | 0/67        | 0/36         | 0/30         | 0/50         | 0/18       | 0/57        | 0/30         | 0/30         | 0/43        |
| chr9  | 17795576  | G | A | SH3GL2   | 25  | 12 | 0,32432 |              |             |             |              | 1/1          | <b>2/2</b>   |            |             |              |              | 1/1         |
| chr9  | 101900236 | T | C | TGFBR1   | 127 | 21 | 0,14189 | 0/9          | 0/9         | 0/7         | 0/5          | 0/10         | 0/10         | 0/4        | 0/21        |              | 0/6          | 0/11        |
| chr9  | 139379174 | G | T | C9orf163 | 108 | 9  | 0,07692 |              |             |             |              |              |              |            |             |              |              |             |
| chr10 | 860867    | G | A |          | 76  | 26 | 0,2549  | <b>2/4</b>   | 0/2         | 0/5         | 1/1          | 0/26         | <b>4/5</b>   | <b>2/2</b> | 0/6         | 0/21         | <b>5/10</b>  | 2/5         |
| chr10 | 7749070   | A | G |          | 137 | 9  | 0,06164 | 1/13         | 1/24        | 3/14        | 0/15         | 2/25         | 4/36         | 0/5        | 0/8         | 1/14         | 1/6          | 1/3         |
| chr10 | 12257724  | C | T |          | 231 | 20 | 0,07968 | 0/14         | 0/9         | 0/9         | 0/16         | 0/12         | 0/14         | 0/11       | 0/13        | 0/9          | 0/10         | 0/9         |
| chr10 | 12257804  | C | A | CDC123   | 258 | 17 | 0,06182 | 0/7          | 0/6         | 0/6         | 0/9          | 0/8          | 0/7          | 0/6        | 0/6         | 0/7          | 0/7          | 0/5         |



|       |           |   |   |           |     |    |         |              |              |              |              |                |              |             |              |              |              |              |
|-------|-----------|---|---|-----------|-----|----|---------|--------------|--------------|--------------|--------------|----------------|--------------|-------------|--------------|--------------|--------------|--------------|
| chr10 | 42392282  | T | A |           | 162 | 10 | 0,05814 |              |              | 0/4          | 0/5          | 0/9            | 0/3          |             |              | 0/1          | 0/4          | 0/4          |
| chr10 | 42681020  | G | T |           | 97  | 12 | 0,11009 |              |              |              |              |                |              |             |              |              |              |              |
| chr10 | 43606776  | C | T | RET       | 196 | 26 | 0,11712 |              |              | 1/1          | 0/1          |                |              |             |              |              |              |              |
| chr10 | 46999502  | A | T |           | 78  | 10 | 0,11364 |              |              | 0/2          |              | 0/4            | 0/1          |             |              |              |              |              |
| chr10 | 71662600  | A | G | COL13A1   | 33  | 5  | 0,13158 | <b>3/3</b>   | 3/21         | 0/5          | 0/2          | 0/1            |              |             | 0/1          |              | 0/4          | 0/1          |
| chr10 | 73862008  | T | C |           | 57  | 45 | 0,44118 | <b>19/25</b> | <b>5/8</b>   | <b>22/22</b> | <b>13/14</b> | <b>17/25</b>   | <b>17/18</b> | <b>4/5</b>  | <b>20/20</b> | <b>42/47</b> | <b>12/25</b> | <b>25/30</b> |
| chr10 | 87676004  | G | C |           | 70  | 6  | 0,07895 | 0/1          | 0/2          |              | 0/10         |                |              |             | 0/1          |              |              |              |
| chr10 | 104176352 | C | T | PSD       | 29  | 9  | 0,23684 |              |              | 1/1          |              | 1/1            |              | 2/2         | <b>12/12</b> | <b>3/3</b>   |              |              |
| chr11 | 5264313   | G | T |           | 90  | 7  | 0,07216 | <b>7/18</b>  | 0/20         | 0/21         | <b>10/11</b> | 3/33           | <b>16/20</b> |             | 0/10         | 4/9          | 3/8          | 1/15         |
| chr11 | 61133485  | T | G |           | 33  | 24 | 0,42105 | <b>17/35</b> | <b>18/18</b> | <b>2/2</b>   | <b>6/14</b>  | <b>13/13</b>   | <b>14/16</b> | 1/2         | 2/2          | <b>36/40</b> | <b>9/12</b>  |              |
| chr11 | 76507090  | C | G |           | 216 | 19 | 0,08085 | 0/9          | 0/8          | 0/2          | 0/12         | 0/5            | 0/3          |             |              | 0/12         | 0/1          | 0/2          |
| chr12 | 27849886  | C | A | REP15     | 114 | 14 | 0,10938 | <b>6/8</b>   | <b>5/8</b>   | 0/4          | 2/4          |                | 2/4          | <b>3/3</b>  | 0/4          | 0/1          | 2/3          | <b>5/5</b>   |
| chr12 | 46320859  | G | A | SCAF11    | 69  | 16 | 0,18824 | 0/1          | 0/6          |              | 0/3          | 0/1            |              |             | 0/3          |              |              |              |
| chr12 | 57538956  | G | A |           | 61  | 23 | 0,27381 |              |              | <b>2/2</b>   | 3/4          | 0/18           |              | 0/2         |              | 1/9          | 1/3          | 0/1          |
| chr12 | 88514928  | G | C | CEP290    | 35  | 9  | 0,20455 | 0/2          | 0/4          | 0/3          | 0/2          | 0/1            | 0/6          | 0/4         | 1/5          | 0/6          | 0/4          | 1/4          |
| chr12 | 101584273 | G | C | SLC5A8    | 68  | 38 | 0,35849 | 2/3          | 2/3          |              | 0/3          |                | 2/3          |             |              | 0/2          | 2/3          | 0/1          |
| chr12 | 121131974 | G | A | MLEC      | 21  | 10 | 0,32258 | <b>14/35</b> | 2/2          | 0/6          | 3/23         | <b>14/14</b>   | <b>14/37</b> | <b>3/8</b>  | <b>19/33</b> | 0/4          | <b>5/15</b>  | 0/7          |
| chr13 | 23411244  | A | G |           | 65  | 7  | 0,09722 |              | 0/1          | 0/1          | 0/1          | 1/1            | 1/1          | 0/1         | 0/1          | 0/1          | 0/1          | 0/1          |
| chr13 | 46425723  | G | A | SIAH3     | 67  | 29 | 0,30208 |              | 3/85         | <b>7/29</b>  | 0/5          | 0/5            | 3/5          | 1/1         | 0/17         | 0/41         | 0/14         | <b>4/15</b>  |
| chr13 | 73636171  | A | T | KLF5      | 126 | 45 | 0,26316 | 0/9          |              | <b>27/33</b> | <b>20/30</b> | <b>12/17</b>   | 1/3          | 3/4         | 1/1          |              | 1/1          |              |
| chr14 | 38091506  | T | A |           | 92  | 29 | 0,23967 |              |              |              | 0/2          | 0/3            | 0/2          | 0/2         | 0/6          |              | 0/3          |              |
| chr14 | 60212452  | G | C | RTN1      | 32  | 13 | 0,28889 | <b>27/27</b> | 0/14         | <b>8/8</b>   | 0/24         | <b>29/29</b>   | <b>17/38</b> | <b>3/7</b>  | 0/24         |              | <b>12/27</b> | <b>6/6</b>   |
| chr14 | 105412633 | G | A | AHNAK2    | 60  | 7  | 0,10448 |              |              | 0/3          |              | 0/1            |              |             |              |              |              | 0/2          |
| chr15 | 43903077  | G | A |           | 142 | 9  | 0,0596  |              |              |              |              |                |              |             |              |              |              |              |
| chr15 | 58984781  | G | A | HSP90AB4P | 42  | 11 | 0,20755 | <b>25/84</b> | 0/36         | 0/31         | <b>20/50</b> | <b>13/51</b>   | <b>33/54</b> | <b>4/20</b> | 0/56         | <b>14/55</b> | <b>9/28</b>  | <b>9/25</b>  |
| chr15 | 75819553  | T | C | PTPN9     | 106 | 44 | 0,29333 | 1/1          | 0/5          | 1/1          | 0/4          | <b>4/7</b>     | 1/3          | 1/1         | 1/2          | 0/3          | 0/2          | 0/1          |
| chr16 | 1712735   | C | T |           | 96  | 16 | 0,14286 | 0/3          |              |              |              |                |              |             | <b>9/26</b>  | <b>8/20</b>  | 0/1          |              |
| chr16 | 7703800   | C | G |           | 32  | 18 | 0,36    | 1/2          | 0/1          |              |              |                |              |             |              |              | 1/1          |              |
| chr16 | 15711282  | C | T | MARF1     | 28  | 9  | 0,24324 | <b>8/41</b>  | 0/38         | 0/32         | <b>14/35</b> | 0/10           | 3/33         |             | 0/1          | 0/25         | 4/7          | 1/8          |
| chr16 | 15714299  | C | A |           | 113 | 7  | 0,05833 |              |              |              |              | 1/1            |              | 0/4         | 0/3          |              |              | 0/1          |
| chr16 | 46402784  | T | C |           | 70  | 9  | 0,11392 |              |              |              |              |                |              |             |              |              |              |              |
| chr17 | 4843158   | G | A | SLC25A11  | 188 | 12 | 0,06    |              |              |              | 0/9          | 0/42           | 0/1          |             | <b>32/32</b> |              |              | 0/1          |
| chr17 | 7350144   | T | G |           | 18  | 5  | 0,21739 | 0/2          |              | 0/1          | 2/6          | <b>24/24</b>   |              | 0/2         |              | <b>2/2</b>   | 0/6          | 0/4          |
| chr17 | 7578271   | T | A | TP53      | 29  | 57 | 0,66279 | <b>15/15</b> | <b>31/31</b> | <b>36/36</b> | <b>10/10</b> | <b>100/100</b> | 15/16        |             | <b>8/8</b>   | 2/2          | <b>15/15</b> | <b>5/5</b>   |
| chr17 | 22247196  | C | G |           | 90  | 8  | 0,08163 |              |              |              |              | <b>0/2</b>     |              |             |              |              |              |              |

|       |           |   |   |          |      |     |         |              |              |             |              |              |              |            |              |              |              |              |
|-------|-----------|---|---|----------|------|-----|---------|--------------|--------------|-------------|--------------|--------------|--------------|------------|--------------|--------------|--------------|--------------|
| chr17 | 22252187  | T | G |          | 257  | 30  | 0,10453 | <b>0/5</b>   | <b>0/1</b>   | <b>5/14</b> | <b>4/9</b>   | <b>4/15</b>  | <b>2/4</b>   | <b>0/1</b> | <b>0/6</b>   | <b>0/1</b>   | <b>2/9</b>   | <b>0/7</b>   |
| chr17 | 22252233  | T | C |          | 178  | 57  | 0,24255 | <b>2/6</b>   | 1/4          | 14/14       | 7/12         | <b>8/14</b>  | <b>2/7</b>   | 1/1        | <b>3/8</b>   | <b>1/2</b>   | 5/11         | <b>3/7</b>   |
| chr17 | 22253208  | T | A |          | 1257 | 68  | 0,05132 | <b>0/1</b>   | <b>0/1</b>   |             | <b>0/1</b>   | <b>0/1</b>   | 0/1          |            | 0/2          | 0/1          |              |              |
| chr17 | 22253258  | T | C |          | 824  | 100 | 0,10823 |              |              |             | <b>1/1</b>   | <b>0/2</b>   | <b>0/1</b>   |            | <b>0/1</b>   |              |              |              |
| chr17 | 22261394  | C | T |          | 85   | 10  | 0,10526 |              |              |             |              |              |              |            |              |              |              |              |
| chr17 | 32366414  | C | G |          | 15   | 7   | 0,31818 | <b>5/5</b>   | <b>3/3</b>   | <b>7/8</b>  | <b>6/6</b>   | 5/13         | <b>6/6</b>   | 1/3        | 0/1          | <b>7/7</b>   | <b>6/8</b>   | <b>4/4</b>   |
| chr17 | 32366781  | C | G |          | 23   | 11  | 0,32353 | <b>6/6</b>   | <b>11/14</b> | <b>8/11</b> | <b>9/10</b>  | <b>5/9</b>   | <b>9/10</b>  | 0/2        | 3/5          | <b>9/9</b>   | <b>9/9</b>   | <b>9/9</b>   |
| chr17 | 78071164  | G | C | CCDC40   | 117  | 22  | 0,15827 | 0/5          | 0/2          | 0/4         | 1/3          | 2/7          | 1/6          |            | 1/8          | 3/3          | 0/7          | 1/7          |
| chr17 | 78092383  | G | A |          | 146  | 15  | 0,09317 |              | 0/10         |             | 0/2          | 0/17         |              |            |              |              | 0/1          | 0/1          |
| chr18 | 7231974   | C | T | LRRC30   | 113  | 7   | 0,05833 | 0/17         | 0/18         | 0/6         | 0/20         | 0/3          | 0/1          | 0/1        | 1/14         | 0/20         | 0/1          |              |
| chr18 | 57638343  | C | T |          | 18   | 6   | 0,25    | <b>2/4</b>   | <b>3/3</b>   | 2/2         | <b>1/1</b>   | 0/2          | 0/3          | 0/5        | 0/8          | 0/5          | <b>0/4</b>   |              |
| chr18 | 70423240  | T | A |          | 83   | 8   | 0,08791 | 1/7          | 0/3          | 0/6         | 2/4          | 0/5          | 3/7          | 0/2        | 3/8          | 0/4          | 3/8          | 2/3          |
| chr19 | 4513189   | C | G | PLIN4    | 68   | 20  | 0,22727 |              | 0/20         | 1/1         | 0/7          |              |              |            |              |              |              |              |
| chr19 | 5685262   | C | T |          | 46   | 19  | 0,29231 |              | 0/1          | <b>2/2</b>  | <b>3/3</b>   | 3/4          |              |            |              |              | 0/2          |              |
| chr19 | 32655494  | A | G |          | 7    | 3   | 0,3     |              |              |             |              | 0/2          |              |            | 0/1          |              | 0/1          |              |
| chr19 | 49442737  | A | G | DHDH     | 19   | 7   | 0,26923 | 0/15         | 2/11         | <b>3/5</b>  | 3/5          | 0/10         | <b>12/17</b> | 2/4        | <b>6/6</b>   | <b>5/7</b>   | <b>3/12</b>  | 0/4          |
| chr19 | 52793612  | A | G | ZNF766   | 131  | 47  | 0,26404 | <b>5/16</b>  | <b>6/6</b>   | <b>2/2</b>  | <b>4/10</b>  | <b>6/25</b>  | 1/11         | 0/10       | <b>14/14</b> | <b>15/34</b> | <b>10/21</b> | 1/2          |
| chr20 | 3674197   | G | T | SIGLEC1  | 71   | 14  | 0,16471 | <b>20/27</b> | <b>16/76</b> | 0/15        | 0/58         | <b>17/82</b> | <b>17/46</b> | 0/4        | 0/21         | <b>13/70</b> | <b>6/67</b>  | <b>10/79</b> |
| chr20 | 25261002  | C | G | PYGB     | 149  | 33  | 0,18132 | <b>8/25</b>  | 8/30         | 2/8         | 2/28         | 0/13         | 0/7          | 1/4        | <b>20/27</b> | <b>10/15</b> | 4/19         | <b>9/10</b>  |
| chr20 | 32441208  | G | T |          | 73   | 18  | 0,1978  |              |              | 0/15        | <b>4/4</b>   |              |              |            | 0/1          |              |              |              |
| chr20 | 39801342  | G | A |          | 78   | 17  | 0,17895 |              |              |             | 0/19         | 0/30         |              |            | 24/25        | 1/1          | 1/1          |              |
| chr20 | 47268008  | T | G | PREX1    | 83   | 7   | 0,07778 | <b>3/13</b>  | 1/14         | <b>4/8</b>  | <b>7/21</b>  | <b>34/52</b> | 0/11         | 1/2        | <b>10/56</b> | 0/6          | 2/10         | 0/3          |
| chr20 | 62325612  | G | T |          | 56   | 22  | 0,28205 |              |              |             | <b>3/4</b>   |              |              |            |              | 0/2          |              |              |
| chr21 | 11181412  | G | C |          | 22   | 8   | 0,26667 |              |              |             |              |              |              |            |              |              |              |              |
| chr21 | 37771809  | C | G |          | 33   | 49  | 0,59756 | <b>7/7</b>   | <b>9/9</b>   | <b>8/8</b>  | <b>10/10</b> | <b>15/15</b> | <b>10/10</b> | 0/1        | <b>11/11</b> | <b>7/7</b>   |              | <b>2/2</b>   |
| chr22 | 39496311  | C | T | APOBEC3H | 55   | 10  | 0,15385 |              |              |             |              |              |              |            |              |              |              |              |
| chrX  | 61731105  | C | G |          | 116  | 13  | 0,10078 | <b>0/10</b>  | <b>0/2</b>   | <b>0/8</b>  | <b>1/31</b>  | <b>0/12</b>  | <b>1/33</b>  |            | 0/8          | <b>0/9</b>   | <b>0/24</b>  | <b>0/14</b>  |
| chrX  | 102339379 | C | T | NXF3     | 70   | 22  | 0,23913 |              |              |             |              |              |              |            | 0/1          | 0/1          |              | 0/1          |
| chrX  | 123695668 | C | T |          | 78   | 9   | 0,10345 | 2/13         | <b>3/8</b>   | 0/2         | <b>6/11</b>  |              | 2/3          | <b>4/6</b> | <b>6/6</b>   | <b>13/22</b> |              |              |

chrom: chromosome

pos: position of the chromosome

ref: reference allele

alt: alternative allele

VAF: variant allele frequency in the bulk sample

**Supplementary Table 5.** Somatic SNVs identified in the CTC samples from patient with ER+ tumor (#3).

| chrom | pos       | ref | alt | gene     | Nref | Nalt | VAF     | 1 CTCa      | 1 CTCb | 1 CTCc       |
|-------|-----------|-----|-----|----------|------|------|---------|-------------|--------|--------------|
| chr1  | 11132229  | C   | A   |          | 30   | 9    | 0,23077 | 0/4         | 0/3    | 0/3          |
| chr1  | 24435237  | G   | C   |          | 46   | 7    | 0,13208 | 0/4         | 1/1    |              |
| chr1  | 36643441  | C   | T   |          | 94   | 23   | 0,19658 |             |        |              |
| chr1  | 52824810  | C   | A   | CC2D1B   | 78   | 25   | 0,24272 |             |        |              |
| chr1  | 76346910  | T   | C   |          | 19   | 5    | 0,20833 | 0/24        | 0/17   | 0/22         |
| chr1  | 111984006 | C   | A   | WDR77    | 85   | 27   | 0,24107 | 0/38        | 0/39   | <b>30/50</b> |
| chr1  | 114246799 | G   | A   |          | 88   | 16   | 0,15385 | 0/7         | 0/4    | 0/6          |
| chr1  | 114308877 | G   | C   | RSBN1    | 213  | 36   | 0,14458 |             |        |              |
| chr1  | 142535606 | G   | C   |          | 11   | 4    | 0,26667 | 3/46        | 1/21   | 2/24         |
| chr1  | 145522692 | C   | T   | PEX11B   | 69   | 5    | 0,06757 | 0/16        | 0/19   | 0/30         |
| chr1  | 150938651 | G   | A   | CERS2    | 49   | 7    | 0,125   | 0/65        | 0/136  | 0/6          |
| chr1  | 152800232 | C   | T   | LCE1A    | 18   | 4    | 0,18182 |             | 0/3    |              |
| chr1  | 158914744 | C   | T   | PYHIN1   | 109  | 7    | 0,06034 | 0/4         | 0/6    | 0/14         |
| chr1  | 160000321 | G   | C   | PIGM     | 81   | 11   | 0,11957 | 0/21        | 0/29   | <b>21/21</b> |
| chr1  | 165414185 | C   | G   |          | 48   | 5    | 0,09434 | 0/20        | 0/22   | 0/11         |
| chr1  | 183532278 | G   | C   |          | 58   | 6    | 0,09375 | 0/31        | 0/36   | 0/11         |
| chr1  | 183616845 | C   | A   |          | 126  | 12   | 0,08696 | 0/6         | 0/8    | 0/7          |
| chr1  | 186008013 | T   | A   | HMCN1    | 73   | 11   | 0,13095 | 0/7         | 0/8    | 0/12         |
| chr1  | 201435171 | G   | A   | PHLDA3   | 98   | 14   | 0,125   | 0/8         | 0/12   | 0/5          |
| chr1  | 203316618 | C   | T   | FMOD     | 82   | 11   | 0,11828 |             | 0/1    |              |
| chr1  | 218478451 | C   | T   | RRP15    | 118  | 13   | 0,09924 | 0/29        | 0/32   | 0/23         |
| chr1  | 220300113 | G   | A   | IARS2    | 157  | 9    | 0,05422 | 0/21        | 0/14   | 0/14         |
| chr1  | 225539393 | G   | C   | DNAH14   | 81   | 5    | 0,05814 | 0/26        | 0/7    | 0/6          |
| chr1  | 231004179 | C   | A   | C1orf198 | 138  | 19   | 0,12102 |             |        |              |
| chr1  | 240370306 | G   | A   | FMN2     | 109  | 6    | 0,05217 | 0/7         | 0/13   | 0/6          |
| chr1  | 247267414 | G   | A   | ZNF669   | 101  | 14   | 0,12174 | 0/18        | 0/11   | 0/4          |
| chr1  | 248097233 | C   | G   |          | 189  | 62   | 0,24701 | <b>3/11</b> | 0/12   | <b>4/6</b>   |
| chr2  | 2094937   | G   | A   |          | 9    | 7    | 0,4375  | 0/1         |        |              |
| chr2  | 15514818  | C   | T   | NBAS     | 84   | 77   | 0,47826 | 0/1         | 0/1    | <b>7/7</b>   |
| chr2  | 15614302  | C   | G   | NBAS     | 34   | 60   | 0,6383  | <b>6/7</b>  | 0/5    | 0/1          |
| chr2  | 38301769  | G   | A   | CYP1B1   | 32   | 31   | 0,49206 |             |        |              |

|      |           |   |   |              |     |    |         |              |      |               |
|------|-----------|---|---|--------------|-----|----|---------|--------------|------|---------------|
| chr2 | 64574771  | G | A |              | 12  | 6  | 0,33333 | 0/41         | 1/28 | <b>12/12</b>  |
| chr2 | 92305747  | A | C |              | 160 | 14 | 0,08046 | 0/1          | 0/5  | 0/3           |
| chr2 | 112752676 | G | A |              | 119 | 11 | 0,08462 |              |      | 0/1           |
| chr2 | 113993039 | G | C | PAX8         | 32  | 8  | 0,2     |              |      |               |
| chr2 | 113993040 | G | C | PAX8         | 33  | 8  | 0,19512 |              |      |               |
| chr2 | 120861681 | G | A | EPB41L5      | 39  | 6  | 0,13333 | 0/17         | 0/18 | 0/11          |
| chr2 | 128935345 | G | C |              | 123 | 14 | 0,10219 | 0/1          | 0/5  | 0/25          |
| chr2 | 170518822 | C | A | CCDC173      | 53  | 10 | 0,15873 | 0/1          | 0/4  | 0/10          |
| chr2 | 173368888 | G | A | ITGA6        | 71  | 6  | 0,07792 | 0/3          | 0/3  | 0/11          |
| chr2 | 179469960 | C | T | TTN          | 81  | 7  | 0,07955 | 0/2          | 0/4  | <b>3/5</b>    |
| chr2 | 179477465 | G | A |              | 45  | 9  | 0,16667 | 0/5          | 0/8  | 3/17          |
| chr2 | 179497066 | C | G | TTN          | 97  | 17 | 0,14912 |              | 0/1  | 0/1           |
| chr2 | 179497145 | C | G |              | 72  | 12 | 0,14286 |              | 0/2  | 1/2           |
| chr2 | 183847991 | G | A |              | 86  | 15 | 0,14851 |              |      |               |
| chr2 | 211069344 | C | G | ACADL        | 124 | 15 | 0,10791 | 0/5          | 0/6  | 0/4           |
| chr2 | 211503832 | A | G |              | 9   | 13 | 0,59091 | <b>16/17</b> | 0/35 | <b>57/57</b>  |
| chr2 | 216965052 | C | T | TMEM169      | 112 | 18 | 0,13846 | 0/12         | 0/13 | 0/33          |
| chr2 | 230705585 | C | T | TRIP12       | 49  | 10 | 0,16949 | 0/3          | 0/3  | 0/5           |
| chr2 | 232146696 | G | A |              | 47  | 6  | 0,11321 | 0/1          | 0/14 | 0/7           |
| chr2 | 234663512 | C | G | LOC100286922 | 113 | 17 | 0,13077 | 0/4          | 1/28 | <b>10/31</b>  |
| chr3 | 10858189  | G | A | SLC6A11      | 7   | 11 | 0,61111 |              |      |               |
| chr3 | 44437898  | G | A | TCAIM        | 23  | 7  | 0,23333 |              | 0/1  |               |
| chr3 | 47453171  | G | C | PTPN23       | 48  | 5  | 0,09434 |              |      |               |
| chr3 | 52382946  | G | A | DNAH1        | 32  | 12 | 0,27273 | 0/1          | 0/1  | 0/1           |
| chr3 | 120424944 | C | T | RABL3        | 112 | 25 | 0,18248 |              |      |               |
| chr3 | 140401869 | C | T | TRIM42       | 210 | 53 | 0,20152 | 0/15         | 0/21 | <b>5/9</b>    |
| chr3 | 150916551 | C | A |              | 72  | 14 | 0,16279 | 0/6          | 0/5  | 2/3           |
| chr3 | 151105646 | G | A | MED12L       | 23  | 4  | 0,14815 | 0/77         | 1/60 | <b>27/115</b> |
| chr3 | 160474432 | C | T | PPM1L        | 66  | 20 | 0,23256 |              |      |               |
| chr4 | 86844     | G | C | ZNF595       | 104 | 13 | 0,11111 | 0/9          | 0/3  | 0/15          |
| chr4 | 6862654   | C | T | KIAA0232     | 157 | 23 | 0,12778 | 0/39         | 0/19 | 0/59          |
| chr4 | 49107435  | C | T |              | 54  | 6  | 0,1     | 1/14         | 0/7  | 0/3           |
| chr4 | 49121633  | C | T |              | 22  | 5  | 0,18519 | 0/1          |      | 0/2           |
| chr4 | 85600189  | C | T | WDFY3        | 86  | 8  | 0,08511 | 0/9          | 0/9  | 0/13          |
| chr4 | 110384489 | C | G | SEC24B       | 99  | 12 | 0,10811 | 0/35         | 0/21 | 0/11          |

|      |           |   |   |          |     |    |         |      |       |               |
|------|-----------|---|---|----------|-----|----|---------|------|-------|---------------|
| chr4 | 119219842 | G | A |          | 52  | 7  | 0,11864 | 0/12 | 0/12  | 0/14          |
| chr4 | 123141475 | C | T |          | 89  | 11 | 0,11    | 0/10 | 0/11  | 0/2           |
| chr5 | 5464616   | C | T | ICE1     | 68  | 10 | 0,12821 | 0/11 | 0/21  | 0/17          |
| chr5 | 23527657  | C | A | PRDM9    | 145 | 8  | 0,05229 |      | 0/1   |               |
| chr5 | 34914888  | C | T | RAD1     | 165 | 18 | 0,09836 | 0/95 | 0/165 | <b>50/163</b> |
| chr5 | 35873622  | G | C | IL7R     | 186 | 18 | 0,08824 | 0/3  | 0/10  | 0/2           |
| chr5 | 49706754  | G | C | EMB      | 158 | 19 | 0,10734 |      |       |               |
| chr5 | 54566500  | C | A | DHX29    | 60  | 8  | 0,11765 | 0/13 | 0/74  | 0/22          |
| chr5 | 72185600  | T | G |          | 39  | 29 | 0,42647 |      |       |               |
| chr5 | 79783990  | C | T |          | 27  | 7  | 0,20588 |      | 0/3   |               |
| chr5 | 90085564  | G | A | ADGRV1   | 38  | 8  | 0,17391 | 0/2  | 0/7   | 0/4           |
| chr5 | 93856592  | C | T | KIAA0825 | 103 | 15 | 0,12712 | 0/18 | 0/54  | 0/62          |
| chr5 | 108387027 | C | T |          | 36  | 19 | 0,34545 | 0/18 | 4/24  | <b>27/42</b>  |
| chr5 | 127641162 | C | G |          | 105 | 7  | 0,0625  | 0/19 | 0/10  | 0/10          |
| chr5 | 131892410 | C | T |          | 63  | 9  | 0,125   | 0/17 | 0/156 | 0/50          |
| chr5 | 135186013 | C | T |          | 40  | 8  | 0,16667 | 1/2  | 0/10  | 0/1           |
| chr5 | 140362154 | G | C |          | 48  | 5  | 0,09434 | 0/24 | 0/35  | 0/26          |
| chr5 | 150487959 | G | A |          | 71  | 6  | 0,07792 | 0/15 | 0/19  | 0/15          |
| chr5 | 153026479 | C | T |          | 88  | 10 | 0,10204 | 0/54 | 0/85  | 0/38          |
| chr5 | 175828728 | G | T |          | 183 | 13 | 0,06633 | 0/1  | 0/1   |               |
| chr5 | 180046488 | G | A | FLT4     | 51  | 6  | 0,10526 |      |       |               |
| chr6 | 25106600  | G | A | CMAHP    | 141 | 13 | 0,08442 | 0/14 | 0/15  | 0/13          |
| chr6 | 27420746  | G | A | ZNF184   | 100 | 15 | 0,13043 | 0/79 | 0/44  | <b>10/37</b>  |
| chr6 | 31911715  | G | A | CFB      | 37  | 6  | 0,13953 | 0/7  | 0/6   | 0/13          |
| chr6 | 32947953  | G | A |          | 39  | 8  | 0,17021 | 0/25 | 0/24  | 0/50          |
| chr6 | 33255271  | G | C | WDR46    | 73  | 8  | 0,09877 | 0/2  | 0/26  | 0/30          |
| chr6 | 33365791  | C | T |          | 57  | 6  | 0,09524 |      |       |               |
| chr6 | 43266213  | C | G | SLC22A7  | 74  | 10 | 0,11905 | 0/19 | 0/15  | <b>3/12</b>   |
| chr6 | 44136845  | T | A |          | 12  | 17 | 0,58621 |      |       |               |
| chr6 | 51524756  | C | T | PKHD1    | 94  | 10 | 0,09615 | 0/7  | 0/2   | 1/7           |
| chr6 | 56357069  | C | T | DST      | 262 | 28 | 0,09655 | 0/10 | 0/3   | 0/8           |
| chr6 | 90605371  | C | T | GJA10    | 50  | 12 | 0,19355 | 0/4  |       | <b>20/24</b>  |
| chr6 | 117709171 | C | A | ROS1     | 61  | 19 | 0,2375  | 0/9  | 0/3   | 1/16          |
| chr6 | 132966591 | G | C | TAAR1    | 90  | 18 | 0,16667 | 0/3  | 0/2   | 0/5           |
| chr6 | 134210631 | G | A | TCF21    | 54  | 10 | 0,15625 | 0/32 |       | 0/14          |

|       |           |   |   |          |     |    |         |              |              |              |
|-------|-----------|---|---|----------|-----|----|---------|--------------|--------------|--------------|
| chr6  | 143082665 | C | T | HIVEP2   | 102 | 25 | 0,19685 | 0/1          | 0/1          | <b>4/4</b>   |
| chr6  | 158476010 | T | C | SYNJ2    | 10  | 15 | 0,6     | <b>8/8</b>   | 1/1          | <b>4/4</b>   |
| chr7  | 31378807  | C | A |          | 268 | 25 | 0,08532 | 0/10         | 0/2          | 0/1          |
| chr7  | 37243705  | G | A |          | 39  | 11 | 0,22    | 0/9          | 0/11         | <b>7/19</b>  |
| chr7  | 45724706  | G | C |          | 45  | 7  | 0,13462 | 0/23         | 2/19         | 3/13         |
| chr7  | 48092288  | C | G |          | 63  | 5  | 0,07353 |              | 0/1          | 0/15         |
| chr7  | 73770862  | C | A | CLIP2    | 92  | 12 | 0,11538 | 0/29         | 0/32         | <b>15/52</b> |
| chr7  | 78130917  | C | G | MAGI2    | 90  | 8  | 0,08163 | 0/56         | 0/27         | 0/107        |
| chr7  | 98608879  | G | C |          | 120 | 21 | 0,14894 | 0/6          | 0/18         | 0/6          |
| chr7  | 105903930 | C | T | NAMPT    | 106 | 14 | 0,11667 |              |              |              |
| chr7  | 128355483 | A | T |          | 29  | 23 | 0,44231 | <b>10/13</b> | <b>30/30</b> | <b>12/12</b> |
| chr7  | 142198021 | G | A |          | 29  | 20 | 0,40816 | 4/6          | 2/2          | 2/3          |
| chr7  | 143000879 | G | C | CASP2    | 68  | 13 | 0,16049 | 0/15         | 0/15         | 0/13         |
| chr7  | 150918792 | G | T |          | 47  | 13 | 0,21667 | 0/1          | 0/3          |              |
| chr8  | 17406321  | G | C | SLC7A2   | 98  | 23 | 0,19008 | 0/6          | 0/12         | 0/1          |
| chr8  | 70674185  | C | T |          | 80  | 11 | 0,12088 | 0/12         | 0/11         | 3/11         |
| chr8  | 71128985  | A | T |          | 156 | 12 | 0,07143 | 0/15         | 0/20         | 0/25         |
| chr8  | 94807750  | G | C |          | 123 | 29 | 0,19079 | 0/1          | 0/10         | <b>6/11</b>  |
| chr8  | 125072480 | C | G | FER1L6   | 146 | 13 | 0,08176 | 0/90         | 0/73         | 0/52         |
| chr8  | 126079879 | G | C | WASHC5   | 205 | 25 | 0,1087  | 0/12         | 0/10         | 1/19         |
| chr8  | 139614387 | G | T | COL22A1  | 94  | 21 | 0,18261 | 0/13         | 0/6          | <b>13/48</b> |
| chr9  | 396908    | G | A | DOCK8    | 93  | 21 | 0,18421 | 0/2          | 0/3          | 0/3          |
| chr9  | 68416460  | A | G |          | 6   | 3  | 0,33333 | 0/1          |              |              |
| chr9  | 136645033 | G | A |          | 34  | 5  | 0,12821 | 0/2          | 0/3          | <b>5/10</b>  |
| chr10 | 24833280  | C | T | KIAA1217 | 127 | 13 | 0,09286 | 0/21         | 0/19         | 0/5          |
| chr10 | 29137288  | C | T |          | 56  | 7  | 0,11111 | 0/60         | 0/34         | 0/64         |
| chr10 | 42364809  | C | T |          | 217 | 13 | 0,05652 | 0/1          | 0/2          | 0/2          |
| chr10 | 42380448  | C | T |          | 65  | 8  | 0,10959 | 0/8          | 0/8          | 0/4          |
| chr10 | 42396703  | T | C |          | 163 | 10 | 0,0578  | 0/11         | 2/16         | 1/10         |
| chr10 | 74684172  | C | T | OIT3     | 146 | 14 | 0,0875  | 0/32         | 0/32         | 0/5          |
| chr10 | 102746526 | G | A | MRPL43   | 103 | 10 | 0,0885  | 0/57         | 0/54         | 0/101        |
| chr10 | 107005362 | C | T | SORCS3   | 60  | 5  | 0,07692 | 0/36         | 1/23         | 0/64         |
| chr10 | 127668567 | C | G |          | 30  | 5  | 0,14286 | 0/1          | 0/2          | 2/3          |
| chr10 | 135178224 | C | T | ECHS1    | 145 | 23 | 0,1369  | 0/13         | 0/1          | 0/27         |
| chr11 | 3838631   | G | A | PGAP2    | 37  | 5  | 0,11905 | 0/2          |              |              |

|       |           |   |   |         |     |    |         |             |             |              |
|-------|-----------|---|---|---------|-----|----|---------|-------------|-------------|--------------|
| chr11 | 5631977   | C | T |         | 84  | 15 | 0,15152 | 0/71        | 0/94        | 0/4          |
| chr11 | 10793128  | G | A | CTR9    | 47  | 5  | 0,09615 | 0/54        | 0/39        | 0/27         |
| chr11 | 20636270  | C | G | SLC6A5  | 172 | 18 | 0,09474 |             | 0/5         | 0/1          |
| chr11 | 27147281  | G | C | BBOX1   | 81  | 19 | 0,19    | 0/25        | 0/4         | 0/15         |
| chr11 | 36596180  | G | C |         | 80  | 7  | 0,08046 | 0/12        | 0/2         | 0/8          |
| chr11 | 43904723  | C | T | ALKBH3  | 67  | 10 | 0,12987 | 1/20        | 1/8         | 3/7          |
| chr11 | 56258722  | A | C | OR5M8   | 33  | 42 | 0,56    | <b>4/4</b>  | 0/3         | <b>6/7</b>   |
| chr11 | 64004652  | T | G |         | 23  | 7  | 0,23333 |             |             |              |
| chr11 | 65733309  | A | G |         | 117 | 17 | 0,12687 | 0/18        | 0/26        | 0/8          |
| chr11 | 66259309  | C | G |         | 110 | 19 | 0,14729 | 0/13        | 0/58        | <b>4/21</b>  |
| chr11 | 66617694  | G | A | PC      | 110 | 9  | 0,07563 |             |             |              |
| chr11 | 67800843  | G | A | NDUFS8  | 63  | 6  | 0,08696 | 0/1         | 0/3         |              |
| chr11 | 75062476  | G | A |         | 21  | 5  | 0,19231 |             |             |              |
| chr11 | 76918399  | C | G | MYO7A   | 22  | 5  | 0,18519 | 0/20        | 0/13        | <b>8/18</b>  |
| chr11 | 94533202  | G | C | AMOTL1  | 68  | 7  | 0,09333 | 0/11        | 0/10        | 0/6          |
| chr11 | 111896326 | C | G | DLAT    | 39  | 15 | 0,27778 | 0/6         | 0/9         | 0/9          |
| chr11 | 122650373 | G | A | UBASH3B | 22  | 10 | 0,3125  | 0/20        | 0/2         | 0/21         |
| chr12 | 6936114   | G | A | GPR162  | 323 | 29 | 0,08239 | 0/37        | 0/37        | 0/24         |
| chr12 | 7640684   | C | T |         | 86  | 10 | 0,10417 | 0/8         | 0/9         | 0/6          |
| chr12 | 13717309  | C | T | GRIN2B  | 127 | 16 | 0,11189 | 0/24        | 0/52        | 0/8          |
| chr12 | 19242275  | G | A |         | 33  | 6  | 0,15385 | 0/22        | 0/33        | 0/11         |
| chr12 | 40729017  | C | G |         | 26  | 4  | 0,13333 | 0/21        | 0/18        | 0/7          |
| chr12 | 49167995  | G | A |         | 9   | 4  | 0,30769 | <b>4/6</b>  | 0/6         | 0/4          |
| chr12 | 49233800  | G | A | DDX23   | 61  | 29 | 0,32222 | 0/5         | 0/6         |              |
| chr12 | 50152144  | T | G |         | 206 | 11 | 0,05069 | 0/14        | 0/2         | 0/1          |
| chr12 | 54964126  | C | T | PDE1B   | 47  | 5  | 0,09615 | 0/24        | 0/25        | 0/12         |
| chr12 | 108589661 | C | T | WSCD2   | 87  | 29 | 0,25    | <b>7/26</b> | 0/19        | 0/28         |
| chr12 | 112130725 | T | C |         | 33  | 20 | 0,37736 | <b>6/11</b> | <b>5/17</b> | 1/3          |
| chr12 | 122694392 | C | T |         | 141 | 8  | 0,05369 |             | 0/1         |              |
| chr12 | 130840137 | G | C | PIWIL1  | 152 | 21 | 0,12139 | 0/13        | 0/19        | 0/17         |
| chr13 | 19748306  | G | T |         | 24  | 8  | 0,25    | 0/2         | 0/1         | 2/6          |
| chr13 | 25058831  | C | T | PARP4   | 40  | 5  | 0,11111 |             |             |              |
| chr13 | 25072256  | C | G | PARP4   | 36  | 10 | 0,21739 | 0/1         | 0/2         |              |
| chr13 | 25807657  | G | A |         | 105 | 18 | 0,14634 |             | 0/2         |              |
| chr13 | 32691564  | G | C | FRY     | 49  | 10 | 0,16949 | 0/10        | 0/39        | <b>47/57</b> |

|       |           |   |   |          |     |    |         |              |              |              |
|-------|-----------|---|---|----------|-----|----|---------|--------------|--------------|--------------|
| chr13 | 88329976  | A | C |          | 71  | 21 | 0,22826 | 0/3          | 0/2          | 0/2          |
| chr13 | 94482637  | G | A | GPC6     | 74  | 23 | 0,23711 | 0/12         | 0/20         | 0/23         |
| chr13 | 110815876 | G | T | COL4A1   | 34  | 9  | 0,2093  | 0/41         |              | <b>23/52</b> |
| chr14 | 20295851  | T | C | OR4N2    | 46  | 13 | 0,22034 | <b>24/33</b> | <b>10/21</b> | <b>15/15</b> |
| chr14 | 20872106  | G | A |          | 73  | 14 | 0,16092 | 0/2          | 0/3          |              |
| chr14 | 24909683  | C | T | SDR39U1  | 108 | 13 | 0,10744 | 0/21         | 0/14         | 0/15         |
| chr14 | 45711647  | G | A | MIS18BP1 | 53  | 8  | 0,13115 | 0/1          | 0/3          | 0/3          |
| chr14 | 62550926  | C | T | SYT16    | 23  | 6  | 0,2069  | 0/9          | 0/3          | 0/18         |
| chr14 | 75469985  | G | T | EIF2B2   | 53  | 10 | 0,15873 | 0/52         | 0/37         | 0/48         |
| chr14 | 89747379  | G | C |          | 33  | 45 | 0,57692 | <b>27/27</b> | <b>11/11</b> | <b>10/10</b> |
| chr14 | 91633669  | G | A | DGLUCY   | 64  | 7  | 0,09859 | 0/21         | 0/36         | 0/47         |
| chr14 | 102508957 | G | A |          | 74  | 14 | 0,15909 | 0/35         | 0/15         | 0/29         |
| chr14 | 106993959 | T | G |          | 94  | 18 | 0,16071 | 0/9          | 0/2          | 0/7          |
| chr14 | 106993964 | A | G |          | 94  | 18 | 0,16071 | <b>0/9</b>   | 0/2          | 0/7          |
| chr15 | 35376912  | G | A |          | 45  | 24 | 0,34783 | <b>5/5</b>   | 0/17         | <b>4/4</b>   |
| chr15 | 40900959  | A | G |          | 22  | 7  | 0,24138 |              | 0/1          |              |
| chr15 | 76222325  | C | G | FBXO22   | 64  | 13 | 0,16883 | 0/2          | 0/1          |              |
| chr15 | 82574861  | C | T | SAXO2    | 27  | 10 | 0,27027 | <b>5/10</b>  | 0/4          | 0/17         |
| chr15 | 83296163  | T | C |          | 34  | 51 | 0,6     | 0/3          | 0/109        | <b>26/32</b> |
| chr15 | 84722439  | G | T |          | 19  | 22 | 0,53659 | <b>1/1</b>   | 0/5          |              |
| chr15 | 91565389  | C | G | VPS33B   | 21  | 6  | 0,22222 | 0/4          | 0/22         | 0/20         |
| chr16 | 4015968   | C | G | ADCY9    | 158 | 11 | 0,06509 | 0/9          | 0/11         | 0/2          |
| chr16 | 4016231   | C | T | ADCY9    | 197 | 18 | 0,08372 | 0/7          | 0/12         | 0/6          |
| chr16 | 4242282   | C | T | SRL      | 92  | 12 | 0,11538 | 0/66         | 0/34         | 0/88         |
| chr16 | 4242436   | G | T | SRL      | 84  | 8  | 0,08696 | 0/34         | 0/23         | 0/50         |
| chr16 | 4242589   | C | G | SRL      | 210 | 20 | 0,08696 | 0/146        | 0/178        | 0/217        |
| chr16 | 4242658   | C | G | SRL      | 166 | 19 | 0,1027  | 0/165        | 0/235        | 0/256        |
| chr16 | 4242706   | G | T | SRL      | 153 | 20 | 0,11561 | 1/108        | 0/159        | 0/180        |
| chr16 | 4385055   | C | G |          | 125 | 11 | 0,08088 | 0/13         | 0/19         | <b>7/35</b>  |
| chr16 | 4626585   | G | A | C16orf96 | 147 | 10 | 0,06369 | 0/2          | 0/21         | 0/20         |
| chr16 | 7102026   | G | T |          | 135 | 16 | 0,10596 | 0/27         | 0/8          | 0/16         |
| chr16 | 12609513  | C | G |          | 96  | 9  | 0,08571 | 0/9          | 0/3          | 0/27         |
| chr16 | 22128033  | A | G |          | 101 | 17 | 0,14407 | 0/30         | 0/5          | <b>7/42</b>  |
| chr16 | 22189526  | G | A |          | 85  | 34 | 0,28571 |              |              |              |
| chr16 | 23640680  | C | T |          | 74  | 9  | 0,10843 | 0/3          | 0/2          | 1/6          |



|       |          |   |   |           |     |    |         |              |             |              |
|-------|----------|---|---|-----------|-----|----|---------|--------------|-------------|--------------|
| chr16 | 23721620 | G | A |           | 69  | 11 | 0,1375  | 0/14         | 0/7         | 0/37         |
| chr16 | 31105781 | C | T |           | 113 | 12 | 0,096   | 0/7          | 0/13        | 0/21         |
| chr16 | 33865245 | T | G |           | 19  | 5  | 0,20833 | 0/2          | 3/4         | 0/1          |
| chr16 | 33866416 | G | T |           | 30  | 5  | 0,14286 | <b>0/2</b>   | 0/1         | 4/6          |
| chr16 | 46388833 | C | G |           | 89  | 8  | 0,08247 | <b>0/3</b>   | 0/6         | 0/7          |
| chr16 | 46417328 | A | C |           | 77  | 9  | 0,10465 | <b>7/51</b>  | <b>3/51</b> | <b>4/76</b>  |
| chr16 | 49669973 | A | C | ZNF423    | 99  | 30 | 0,23256 |              |             |              |
| chr16 | 69703949 | A | T | NFAT5     | 92  | 84 | 0,47727 |              |             | 0/1          |
| chr16 | 71715801 | G | A | PHLPP2    | 48  | 10 | 0,17241 | 0/16         | 0/12        | 0/11         |
| chr16 | 89235159 | C | T | LINC02138 | 21  | 12 | 0,36364 | 0/1          | 1/13        | <b>6/8</b>   |
| chr16 | 89831306 | C | T | FANCA     | 83  | 11 | 0,11702 | 0/36         | 0/53        | 0/12         |
| chr17 | 2202763  | C | T | SMG6      | 50  | 36 | 0,4186  | <b>5/5</b>   |             | 1/6          |
| chr17 | 3477002  | G | T | TRPV1     | 61  | 11 | 0,15278 | 0/9          |             | 0/12         |
| chr17 | 4619304  | C | T | ARRB2     | 177 | 38 | 0,17674 |              |             |              |
| chr17 | 7811758  | A | C | CHD3      | 45  | 5  | 0,1     | 0/40         | 1/35        | 0/59         |
| chr17 | 10370020 | G | C | MYH4      | 45  | 4  | 0,08163 | 0/5          | 0/8         |              |
| chr17 | 18148904 | C | G | FLII      | 94  | 16 | 0,14545 |              |             |              |
| chr17 | 25266585 | C | T |           | 10  | 4  | 0,28571 | 0/14         | 1/5         | 0/8          |
| chr17 | 26370088 | T | C | NLK       | 28  | 24 | 0,46154 | <b>16/25</b> | 1/57        | <b>28/65</b> |
| chr17 | 28758746 | C | G |           | 40  | 7  | 0,14894 |              |             |              |
| chr17 | 36064949 | G | C | HNF1B     | 75  | 10 | 0,11765 | 0/3          | 0/15        | 0/14         |
| chr17 | 42148540 | C | A |           | 28  | 8  | 0,22222 |              | 0/3         | 1/5          |
| chr17 | 57288086 | G | C | SMG8      | 63  | 7  | 0,1     | 0/22         | 0/67        | 0/11         |
| chr17 | 61957797 | C | T | GH2       | 78  | 11 | 0,1236  | 0/5          | 0/31        | 0/14         |
| chr17 | 67041339 | A | T | ABCA9     | 126 | 8  | 0,0597  | 0/4          | 0/4         | 0/10         |
| chr17 | 72700885 | C | T | CD300LF   | 103 | 83 | 0,44624 | <b>5/9</b>   | 2/9         | <b>7/17</b>  |
| chr17 | 73150472 | G | A | JPT1      | 37  | 6  | 0,13953 |              | 0/1         |              |
| chr17 | 74465346 | C | T | AANAT     | 103 | 14 | 0,11966 | 0/2          |             |              |
| chr18 | 10750123 | G | A | PIEZO2    | 92  | 10 | 0,09804 | 0/12         | 0/9         | 0/29         |
| chr18 | 14777917 | G | A |           | 37  | 6  | 0,13953 |              | 0/2         |              |
| chr18 | 56940306 | C | T | RAX       | 40  | 10 | 0,2     |              |             |              |
| chr19 | 1923133  | C | A | SCAMP4    | 80  | 29 | 0,26606 |              | 0/22        | 0/3          |
| chr19 | 3719871  | C | G |           | 47  | 8  | 0,14545 | 0/2          | 0/2         | 3/3          |
| chr19 | 4222643  | C | T |           | 57  | 12 | 0,17391 | 2/7          | 2/5         | 1/8          |
| chr19 | 17597549 | G | A | SLC27A1   | 91  | 9  | 0,09    |              |             |              |

|       |          |   |   |         |     |    |         |              |       |              |
|-------|----------|---|---|---------|-----|----|---------|--------------|-------|--------------|
| chr19 | 31770574 | G | A | TSHZ3   | 53  | 8  | 0,13115 | 0/8          | 0/22  | 2/6          |
| chr19 | 40884190 | C | G |         | 31  | 4  | 0,11429 |              |       |              |
| chr19 | 40886475 | G | C | HIPK4   | 63  | 7  | 0,1     |              |       |              |
| chr19 | 40886994 | G | T | HIPK4   | 62  | 17 | 0,21519 | 0/2          |       |              |
| chr19 | 41869472 | A | T |         | 37  | 9  | 0,19565 | 0/39         | 0/45  | <b>46/77</b> |
| chr19 | 42891237 | C | A |         | 27  | 8  | 0,22857 |              |       |              |
| chr19 | 47960399 | C | T | SLC8A2  | 9   | 6  | 0,4     |              |       |              |
| chr19 | 52873233 | G | C |         | 107 | 33 | 0,23571 | 0/8          | 0/3   | <b>6/13</b>  |
| chr19 | 52887745 | C | G | ZNF880  | 64  | 7  | 0,09859 | 0/10         | 0/12  | 0/27         |
| chr19 | 53056509 | G | A | ZNF808  | 86  | 29 | 0,25217 | 0/13         | 0/10  | 0/30         |
| chr19 | 53840451 | T | A |         | 62  | 12 | 0,16216 | 0/27         | 0/23  | <b>13/51</b> |
| chr19 | 54668149 | C | T |         | 8   | 12 | 0,6     | <b>26/45</b> | 1/54  | <b>46/68</b> |
| chr19 | 56692130 | C | A |         | 48  | 12 | 0,2     | 0/3          | 0/7   | 0/9          |
| chr19 | 56736307 | C | A | ZSCAN5A | 45  | 6  | 0,11765 | 0/11         | 0/18  | <b>15/20</b> |
| chr19 | 57088960 | G | T | ZNF470  | 105 | 15 | 0,125   | 0/3          | 0/16  | 0/11         |
| chr20 | 896930   | C | G |         | 15  | 11 | 0,42308 | <b>11/15</b> | 0/7   | <b>8/14</b>  |
| chr20 | 1161959  | G | C | TMEM74B | 143 | 15 | 0,09494 |              | 0/1   | 0/3          |
| chr20 | 1285777  | G | C | SNPH    | 53  | 6  | 0,10169 | 0/4          | 0/5   | 0/1          |
| chr20 | 21689893 | C | G | PAX1    | 78  | 7  | 0,08235 |              |       |              |
| chr20 | 31024121 | G | T | ASXL1   | 101 | 12 | 0,10619 | 0/28         | 0/41  | 0/32         |
| chr20 | 34130567 | C | T |         | 49  | 7  | 0,125   | 0/81         | 0/109 | 0/64         |
| chr20 | 43243286 | C | G | PKIG    | 81  | 11 | 0,11957 | 0/18         | 0/15  | <b>9/21</b>  |
| chr20 | 58381200 | G | C | PHACTR3 | 108 | 14 | 0,11475 | 0/7          | 0/36  | 0/15         |
| chr21 | 10920017 | C | T |         | 177 | 29 | 0,14078 | 1/14         | 0/23  | 0/14         |
| chr21 | 33840085 | C | G | EVA1C   | 101 | 10 | 0,09009 | 0/5          | 0/2   | 0/9          |
| chr21 | 39325126 | C | G |         | 23  | 16 | 0,41026 | <b>18/44</b> | 0/14  | 2/16         |
| chr22 | 17646245 | C | T |         | 53  | 10 | 0,15873 | 0/1          | 0/2   | 0/1          |
| chrX  | 3533811  | G | A |         | 127 | 66 | 0,34197 | <b>49/50</b> | 0/40  | <b>37/61</b> |
| chrX  | 17745920 | G | A | NHS     | 187 | 16 | 0,07882 | 0/27         | 0/10  | 0/34         |
| chrX  | 47001802 | C | A | NDUFB11 | 88  | 14 | 0,13725 | 0/103        | 1/92  | <b>14/26</b> |
| chrX  | 48382408 | C | T | EBP     | 61  | 5  | 0,07576 | 0/36         | 0/34  | 0/49         |
| chrX  | 48546836 | C | T | WAS     | 25  | 23 | 0,47917 |              | 0/1   | <b>4/4</b>   |
| chrX  | 54952040 | C | G | TRO     | 170 | 19 | 0,10053 | 0/2          |       |              |
| chrX  | 74387681 | G | C |         | 28  | 4  | 0,125   | 0/1          |       |              |
| chrX  | 74803561 | G | T |         | 20  | 4  | 0,16667 | 0/14         | 0/14  | 0/15         |

|      |           |   |   |         |     |    |         |             |       |              |
|------|-----------|---|---|---------|-----|----|---------|-------------|-------|--------------|
| chrX | 77913918  | C | G |         | 125 | 15 | 0,10714 | 0/12        | 0/10  | 0/24         |
| chrX | 103045413 | C | G |         | 126 | 18 | 0,125   | 0/18        | 0/24  | 0/60         |
| chrX | 105912555 | T | A | CXorf57 | 31  | 31 | 0,5     | <b>4/10</b> | 2/5   | 2/15         |
| chrX | 111624264 | C | T |         | 57  | 7  | 0,10938 | 0/13        | 0/17  | 0/43         |
| chrX | 118123440 | A | G | LONRF3  | 37  | 7  | 0,15909 | 0/11        | 0/8   | <b>11/15</b> |
| chrX | 123516468 | G | C |         | 57  | 8  | 0,12308 | 0/5         | 0/11  | 0/8          |
| chrX | 148048348 | C | G | AFF2    | 149 | 15 | 0,09146 | 0/120       | 0/104 | 0/180        |
| chrX | 153587943 | C | A | FLNA    | 76  | 25 | 0,24752 |             | 0/2   | 0/2          |
| chrX | 153599265 | C | T | FLNA    | 94  | 12 | 0,11321 |             |       |              |
| chrX | 153609602 | A | T |         | 19  | 8  | 0,2963  |             |       |              |
| chrX | 153668752 | C | T | GDI1    | 59  | 6  | 0,09231 |             | 0/2   | 0/1          |
| chrX | 154157976 | C | G | F8      | 178 | 34 | 0,16038 | 0/30        | 0/36  | 0/34         |
| chrX | 154158408 | C | G | F8      | 80  | 16 | 0,16667 | 0/2         | 0/3   | 0/6          |

chrom: chromosome

pos: position of the chromosome

ref: reference allele

alt: alternative allele

VAF: variant allele frequency in the bulk sample

**Supplementary Table 6.** Common, shared CTC and private CTC mutations for patient with TNBC (#1).

|                | <b>Non-duplicate read pairs</b> | <b>Mutations</b> | <b>Mutations present in bulk</b> | <b>Mutations present in other CTCs</b> | <b>Private mutations</b> |
|----------------|---------------------------------|------------------|----------------------------------|----------------------------------------|--------------------------|
| <b>15 WBCs</b> | 24108408                        | 37               | 0                                | 9                                      | 28                       |
| <b>1 CTCa</b>  | 27107890                        | 855              | 11                               | 20                                     | 824                      |
| <b>1 CTCb</b>  | 24559245                        | 631              | 16                               | 26                                     | 589                      |
| <b>1 CTCc</b>  | 26994739                        | 390              | 17                               | 21                                     | 352                      |
| <b>1 CTCd</b>  | 22636812                        | 654              | 14                               | 17                                     | 623                      |
| <b>5 CTCa</b>  | 25402660                        | 312              | 13                               | 17                                     | 282                      |
| <b>5 CTCb</b>  | 25358787                        | 309              | 18                               | 25                                     | 266                      |
| <b>5 CTCc</b>  | 10696284                        | 141              | 10                               | 12                                     | 119                      |

**Supplementary Table 7.** Common, shared CTC and private CTC mutations for patient with HER2+ tumor (#2).

|                | <b>Non-duplicate read pairs</b> | <b>Mutations</b> | <b>Mutations present in bulk</b> | <b>Mutations present in other CTCs</b> | <b>Private mutations</b> |
|----------------|---------------------------------|------------------|----------------------------------|----------------------------------------|--------------------------|
| <b>10 WBCs</b> | 25537426                        | 78               | 0                                | 10                                     | 68                       |
| <b>1 CTCa</b>  | 19173148                        | 1513             | 27                               | 29                                     | 1457                     |
| <b>10 CTCa</b> | 22432107                        | 1661             | 18                               | 36                                     | 1607                     |
| <b>1 CTCb</b>  | 17115512                        | 1610             | 23                               | 30                                     | 1557                     |
| <b>10 CTCb</b> | 22961019                        | 947              | 26                               | 28                                     | 893                      |
| <b>1 CTCc</b>  | 27816697                        | 2445             | 24                               | 23                                     | 2398                     |
| <b>10 CTCc</b> | 28769658                        | 433              | 19                               | 24                                     | 390                      |
| <b>10 CTCd</b> | 6030197                         | 460              | 10                               | 12                                     | 438                      |
| <b>10 CTCe</b> | 18428610                        | 1483             | 19                               | 37                                     | 1427                     |
| <b>1 CTCd</b>  | 13153192                        | 1830             | 23                               | 38                                     | 1769                     |
| <b>10 CTCf</b> | 22380988                        | 329              | 19                               | 34                                     | 276                      |
| <b>10 CTCg</b> | 12733448                        | 421              | 15                               | 34                                     | 372                      |

**Supplementary Table 8.** Common, shared CTC and private CTC mutations for patient with ER+ tumor (#3).

|               | <b>Non-duplicate read pairs</b> | <b>Mutations</b> | <b>Mutations present in bulk</b> | <b>Mutations present in other CTCs</b> | <b>Private mutations</b> |
|---------------|---------------------------------|------------------|----------------------------------|----------------------------------------|--------------------------|
| <b>20 WBC</b> | 30798109                        | 89               | 0                                | 10                                     | 79                       |
| <b>1 CTCa</b> | 23949238                        | 1032             | 23                               | 16                                     | 993                      |
| <b>1 CTCb</b> | 22602049                        | 1614             | 4                                | 22                                     | 1588                     |
| <b>1 CTCc</b> | 24654506                        | 1215             | 47                               | 17                                     | 1151                     |

**Supplementary Table 9.** Coverage of the exome sequencing of the primary tumor and PBMC samples.

| <b>Patient ID</b> | <b>BC type</b> | <b>Coverage tumor</b> | <b>Coverage normal</b> | <b>Purity (ABSOLUTE)</b> |
|-------------------|----------------|-----------------------|------------------------|--------------------------|
| #1                | TNBC           | 142,04                | 106,11                 | 0,217185816              |
| #2                | ER-/HER2+      | 133,47                | 110,65                 | 0,344594979              |
| #3                | ER+/HER2-      | 150,45                | 144,07                 | 0,324138482              |
